# Supplementary material for: Super-enhancer profiling identifies novel critical and targetable cancer survival gene LYL1 in pediatric acute myeloid leukemia
Source: J Exp Clin Cancer Res. 2022 Jul 16;41:225. doi: 10.1186/s13046-022-02428-9 (PMC9288051; doi:10.1186/s13046-022-02428-9)
Supplement: Supplementary file 7 — Additional file 7: Supplementary Table 7. 200 hundred genes which harbor super-enhancers in ≧ 10 AML samples. [file 13046_2022_2428_MOESM7_ESM.xlsx]

## Sheet: Sheet1
200 genes which were commonly associated with super enhancers in ≧10 AML samples
ADRBK1
AKNA
ANKRD13D
ANP32A
ANP32A-IT1
APOLD1
ARID1A
ASB9P1
ASNA1
BEST2
BZRAP1
BZRAP1-AS1
C19orf43
CDK6
CDKN1B
FLJ37453
FMNL1
FOXP1
FRMD8
GLTSCR1L
GPR19
HOOK2
JUNB
JUND
KDM2A
KIAA1683
LINC01089
LINC01126
LINC01412
LOC100130987
LOC101927497
LOC101927770
LOC284454
LOC729966
LSM4
MAP3K14-AS1
MAST1
MIR1244-2
MIR1284
MIR142
MIR181C
MIR181D
MIR23A
MIR24-2
MIR27A
MIR3188
MIR4312
MIR4487
MIR4736
MIR5684
MIR612
MIR613
MYBPC3
NANOS3
NEAT1
ORM1
ORM2
PDE4C
PGPEP1
PRDX2
PSMC3
PTMA
RHOF
RIN3
RNASEH2A
RTBDN
RUNX1
SAE1
SCYL1
SETD1B
SLC25A45
SLC39A13
SPATA32
SPEN
SPI1
SSH3
SUPT4H1
TBCC
UQCRHL
ZC3H4
ZEB2
ZEB2-AS1
ZFP36L2
ZNF217
ZSWIM4
ALKBH4
ANXA2R
ARL4D
ATP5D
ATP6V0CP3
C10orf91
C19orf24
CBARP
CELF2
CHD3
CHST11
CIRBP
CIRBP-AS1
CPLX3
CROCC
CSK
CYB5D1
CYP1A2
DLEU1
DLEU2
DLGAP1
DLGAP1-AS1
DLGAP1-AS2
EFNA2
ELMSAN1
FAM117A
FAM78A
FLJ32255
GSE1
HEMGN
HSH2D
IER2
INPP5A
IRF2BP2
KAT7
KDM6B
KMT2E
KMT2E-AS1
LINC00184
LINC00854
LINC00899
LINC00910
LINC01004
LMAN1L
LOC100133985
LOC100506476
LOC100630923
LOC101927787
LOC101927851
LOC153684
LOC648987
LOC91450
LRWD1
LYL1
MACF1
MALAT1
MBP
MED29
MEF2D
MIDN
MIR3619
MIR4467
MIR4505
MIR4513
MIR4530
MIR4763
MIR5090
MIR548O
MIRLET7A3
MIRLET7B
MIRLET7BHG
MPO
NAA38
NACC1
ORAI2
PAF1
PCBP1
PCBP1-AS1
PLEKHG2
PNMA1
POLR2J
PPAPDC3
PPP1R8
PRKRIP1
PRR34
PRR34-AS1
PWWP2B
RAB8A
RNF220
RNU2-1
RNVU1-18
RPA2
RPS16
RREB1
RUNX2
SCARNA1
SH2D7
SLC35B1
SMAP2
SMPDL3B
SRGN
ST13P4
ST3GAL1
STK11
STX10
SUPT3H
SUPT5H
TBC1D2B
THEMIS2
TMEM106A
TMEM88
TNRC18
TRMT1
VPS26A
ZFP36
