# Supplementary material for: Super-enhancer profiling identifies novel critical and targetable cancer survival gene LYL1 in pediatric acute myeloid leukemia
Source: J Exp Clin Cancer Res. 2022 Jul 16;41:225. doi: 10.1186/s13046-022-02428-9 (PMC9288051; doi:10.1186/s13046-022-02428-9)
Supplement: Supplementary file 8 — Additional file 8: Supplementary Table 8. Gene ontology enrichment analysis results of the 200 genes which were commonly associated with super-enhancers in ≧10 AML samples. [file 13046_2022_2428_MOESM8_ESM.xlsx]

## Sheet: DAVID-GO
Category	Term	Count	PValue	Genes
GOTERM_BP_DIRECT	GO:0006366~transcription from RNA polymerase II promoter	12	0.000463299	SPI1, AKNA, JUND, SUPT4H1, SUPT5H, MEF2D, JUNB, RREB1, POLR2J, SUPT3H, RUNX2, RUNX1
GOTERM_BP_DIRECT	GO:0006357~regulation of transcription from RNA polymerase II promoter	11	0.000550513	LYL1, JUND, ELMSAN1, SUPT4H1, CHD3, ARID1A, SUPT5H, JUNB, SUPT3H, RUNX2, FOXP1
GOTERM_BP_DIRECT	GO:0000122~negative regulation of transcription from RNA polymerase II promoter	13	0.00227086	SPEN, SPI1, JUND, SUPT4H1, ARID1A, SUPT5H, FOXP1, ZEB2, ZFP36, ZNF217, PAF1, JUNB, RREB1
GOTERM_BP_DIRECT	GO:1900153~positive regulation of nuclear-transcribed mRNA catabolic process, deadenylation-dependent decay	3	0.00354607	ZFP36, NANOS3, ZFP36L2
GOTERM_BP_DIRECT	GO:0006351~transcription, DNA-templated	23	0.00607227	KMT2E, SPEN, KDM2A, ANP32A, SETD1B, SUPT4H1, IRF2BP2, CHD3, ARID1A, MED29, FOXP1, LYL1, ZEB2, ALKBH4, ELMSAN1, PPP1R8, NACC1, ZNF217, KAT7, MEF2D, PTMA, POLR2J, SCYL1
GOTERM_BP_DIRECT	GO:0045638~negative regulation of myeloid cell differentiation	3	0.00652539	ZFP36, CDK6, PAF1
GOTERM_BP_DIRECT	GO:0030316~osteoclast differentiation	3	0.00949446	EFNA2, JUNB, FOXP1
GOTERM_BP_DIRECT	GO:0032785~negative regulation of DNA-templated transcription, elongation	2	0.0128223	SUPT4H1, SUPT5H
GOTERM_BP_DIRECT	GO:0055007~cardiac muscle cell differentiation	3	0.0129542	KDM6B, ARID1A, FOXP1
GOTERM_BP_DIRECT	GO:0050434~positive regulation of viral transcription	3	0.0148598	SUPT4H1, SUPT5H, POLR2J
GOTERM_BP_DIRECT	GO:0006368~transcription elongation from RNA polymerase II promoter	4	0.0180047	SUPT4H1, PAF1, SUPT5H, POLR2J
GOTERM_BP_DIRECT	GO:0032496~response to lipopolysaccharide	5	0.0214649	JUND, CYP1A2, MPO, JUNB, FOXP1
GOTERM_BP_DIRECT	GO:0045944~positive regulation of transcription from RNA polymerase II promoter	13	0.0236756	KDM6B, SPI1, AKNA, JUND, SUPT4H1, SUPT5H, FOXP1, RUNX1, ZEB2, PCBP1, PAF1, JUNB, MEF2D
GOTERM_BP_DIRECT	GO:0045646~regulation of erythrocyte differentiation	2	0.0254817	SPI1, CDK6
GOTERM_BP_DIRECT	GO:0002062~chondrocyte differentiation	3	0.0260179	MEF2D, RUNX2, RUNX1
GOTERM_BP_DIRECT	GO:0043488~regulation of mRNA stability	4	0.0287831	ZFP36, PSMC3, ANP32A, ZFP36L2
GOTERM_BP_DIRECT	GO:0006355~regulation of transcription, DNA-templated	17	0.0308237	KDM2A, ANP32A, SETD1B, SUPT4H1, IRF2BP2, CHD3, MED29, ZFP36L2, SUPT3H, RUNX2, LYL1, ALKBH4, PPP1R8, ZNF217, KAT7, RREB1, SCYL1
GOTERM_BP_DIRECT	GO:0043966~histone H3 acetylation	3	0.0311856	SPI1, KAT7, SUPT3H
GOTERM_BP_DIRECT	GO:0042127~regulation of cell proliferation	5	0.0315473	CDKN1B, JUND, CHST11, CSK, JUNB
GOTERM_BP_DIRECT	GO:0002682~regulation of immune system process	2	0.0317509	ORM1, ORM2
GOTERM_BP_DIRECT	GO:0032680~regulation of tumor necrosis factor production	2	0.0379802	ZFP36, FOXP1
GOTERM_BP_DIRECT	GO:0060770~negative regulation of epithelial cell proliferation involved in prostate gland development	2	0.0379802	STK11, CDKN1B
GOTERM_BP_DIRECT	GO:0045892~negative regulation of transcription, DNA-templated	8	0.0420891	SPEN, SPI1, CDKN1B, NACC1, ZNF217, RUNX2, RUNX1, FOXP1
GOTERM_BP_DIRECT	GO:0030854~positive regulation of granulocyte differentiation	2	0.0441697	KMT2E, RUNX1
GOTERM_BP_DIRECT	GO:1904628~cellular response to phorbol 13-acetate 12-myristate	2	0.0441697	CDK6, ZFP36L2
GOTERM_BP_DIRECT	GO:0045893~positive regulation of transcription, DNA-templated	8	0.0484296	KMT2E, LYL1, SPI1, ARID1A, RREB1, SUPT3H, RUNX2, RUNX1
